# Supplementary material
Source: HighWire-hosted journal article supplement (https://bmjopen.bmj.com/content/8/6/e017525)
Supplement: inline-supplementary-material-4 [file inline-supplementary-material-4.pdf]

**Supplementary Table II:** Results from the multinomial logistic regressions models for males estimating the probabilities of group membership according to Unadjusted and Adjusted Model 1: paid working hours and unpaid working hours; Unadjusted and adjusted Model 2: total working hours. Reference group: Very low stable (Group 1). Estimates: log odds ratios (\*: significance at 5% level); SE: standard errors (in parentheses). OR: odds ratios: CI: 95% Confidence Intervals (in brackets).

| Trajectory groups            | Low Stable    |                   | High Decreasing |                    | Doubtful Stable |                   | High Stable   |                   |
|------------------------------|---------------|-------------------|-----------------|--------------------|-----------------|-------------------|---------------|-------------------|
| Unadjusted Models            |               |                   |                 |                    |                 |                   |               |                   |
| Model 1                      |               |                   |                 |                    |                 |                   |               |                   |
|                              | Estimate (SE) | OR [95%CI]        | Estimate (SE)   | OR [95%CI]         | Estimate (SE)   | OR [95%CI]        | Estimate (SE) | OR [95%CI]        |
| Paid Working Hours           | 0.01 (0.01)   | 1.01 [0.99; 1.01] | 0.01 (0.02)     | 1.01 [0.97; 1.05]  | 0.00 (0.01)     | 1.00 [0.99; 1.01] | -0.00 (0.01)  | 1.00 [0.97; 1.02] |
| Unpaid Working Hours         | 0.09* (0.05)  | 1.10 [1.00; 1.21] | 0.01 (0.17)     | 1.01 [0.72; 1.43]  | 0.28* (0.06)    | 1.32 [1.18; 1.47] | 0.26* (0.10)  | 1.30 [1.06; 1.59] |
| Model 2                      |               |                   |                 |                    |                 |                   |               |                   |
|                              | Estimate (SE) | OR [95%CI]        | Estimate (SE)   | OR [95%CI]         | Estimate (SE)   | OR [95%CI]        | Estimate (SE) | OR [95%CI]        |
| Total Working Hours          | 0.13* (0.05)  | 1.14 [1.03; 1.27] | -0.01 (0.20)    | 0.00 [0.667; 1.47] | 0.28* (0.06)    | 1.32 [1.16; 1.50] | 0.18 (0.13)   | 1.20 [0.93; 1.53] |
| Adjusted Models <sup>!</sup> |               |                   |                 |                    |                 |                   |               |                   |
| Model 1                      |               |                   |                 |                    |                 |                   |               |                   |
|                              | Estimate (SE) | OR [95%CI]        | Estimate (SE)   | OR [95%CI]         | Estimate (SE)   | OR [95%CI]        | Estimate (SE) | OR [95%CI]        |
| Paid Working Hours           | 0.00 (0.01)   | 1.00 [0.99; 1.01] | 0.01 (0.02)     | 1.01 [0.97; 1.06]  | 0.00 (0.01)     | 1.00 [0.99; 1.01] | 0.00 (0.01)   | 1.00 [0.97; 1.03] |
| Unpaid Working Hours         | 0.02 (0.05)   | 1.10 [0.92; 1.13] | -0.02 (0.21)    | 0.98 [0.65; 1.49]  | 0.20* (0.06)    | 1.22 [1.08; 1.38] | 0.25* (0.11)  | 1.28 [1.02; 1.60] |
| Model 2                      |               |                   |                 |                    |                 |                   |               |                   |
|                              | Estimate (SE) | OR [95%CI]        | Estimate (SE)   | OR [95%CI]         | Estimate (SE)   | OR [95%CI]        | Estimate (SE) | OR [95%CI]        |
| Total working hours          | -0.04 (0.06)  | 1.04 [0.92; 1.17] | -0.03 (0.23)    | 0.97 [0.62; 1.52]  | 0.21* (0.07)    | 1.24 [1.08; 1.42] | 0.18 (0.13)   | 1.20 [0.92; 1.56] |

<sup>!</sup> Adjusted Models for age, civil status, and socio-economic status

\*significance at 5%
